# Supplementary material for: Synthesis and in vitro photodynamic activities of di-α-substituted zinc(ii) phthalocyanine derivatives
Source: Royal Society of Chemistry journal article supplement (doi:10.1039/b817940a), 2009-01-01
Supplement: b817940a.pdf [file b817940a.pdf]

## **Supporting Information**

### **Synthesis and *in vitro* photodynamic activities of di- $\alpha$ -substituted zinc(II) phthalocyanine derivatives**

J.-Y. Liu, P.-C. Lo, X.-J. Jiang, W.-P. Fong and D. K. P. Ng\*

**Fig. S1**  $^1\text{H}$  NMR spectrum of **9b** in  $\text{CDCl}_3$  with a trace amount of pyridine- $\text{d}_5$ .

**Fig. S2** Electronic absorption spectra of **6a** and **9a** in the RPMI culture medium.

**Fig. S3** Visualisation of intracellular fluorescence of HT29 after incubation with **6a-6d**  
and **9a-9b**.

**$^1\text{H}$  and  $^{13}\text{C}\{^1\text{H}\}$  NMR spectra of all the new compounds**

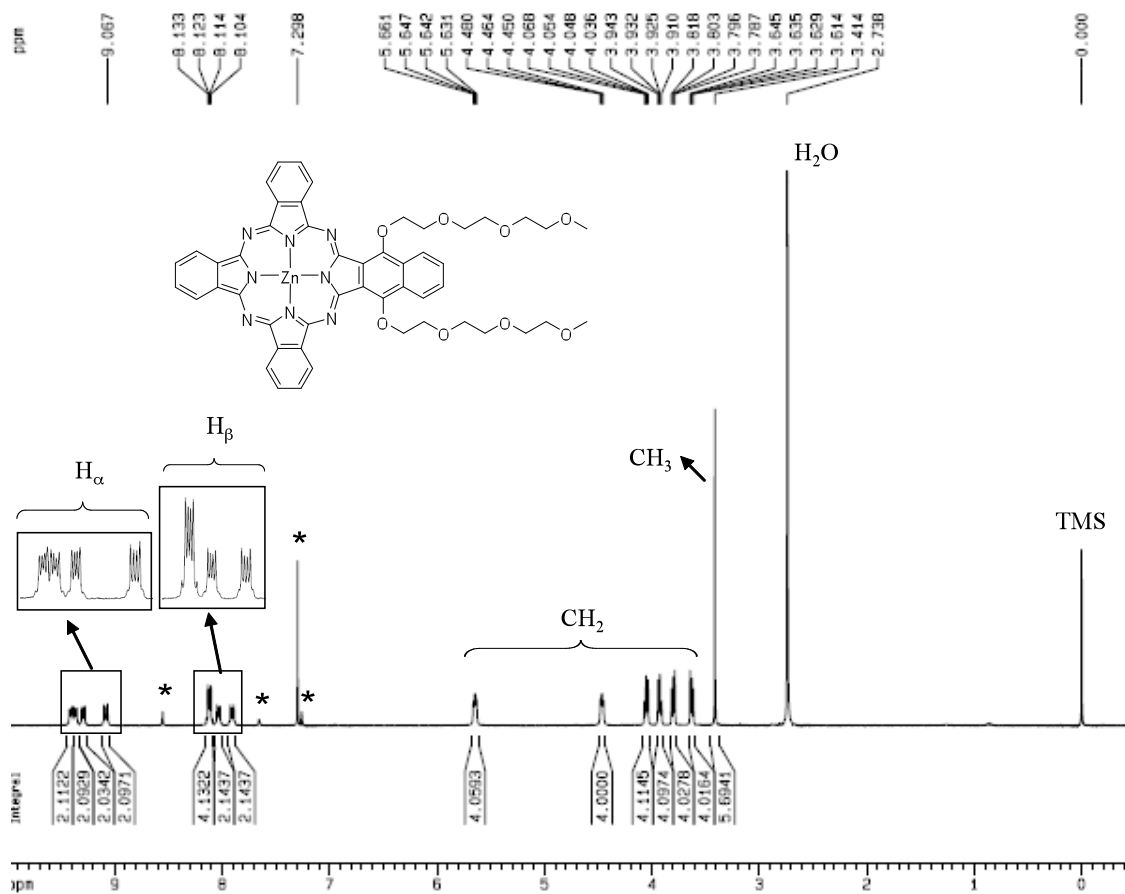

**Fig. S1**  $^1\text{H}$  NMR spectrum of **9b** in  $\text{CDCl}_3$  with a trace amount of  $\text{pyridine-d}_5$ . Signals for the residual solvents are marked with asterisks.

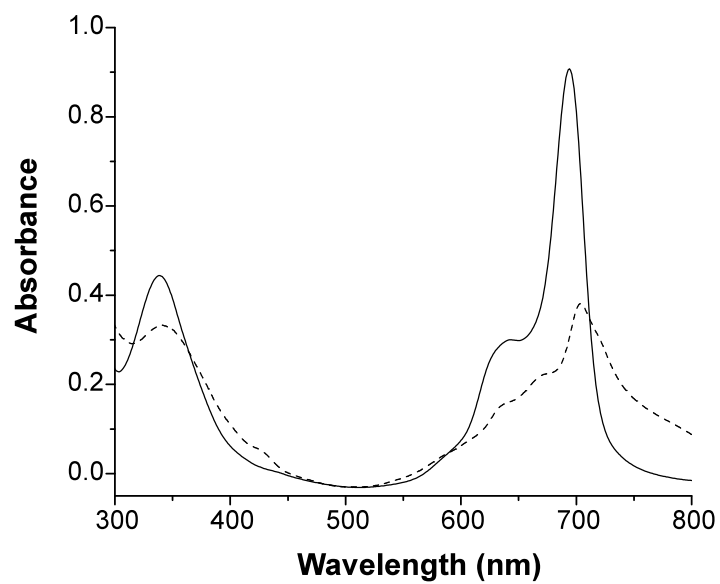

**Fig. S2** Electronic absorption spectra of **6a** (—) and **9a** (-----), formulated with Cremophor EL, in the RPMI culture medium (both at 8  $\mu$ M).

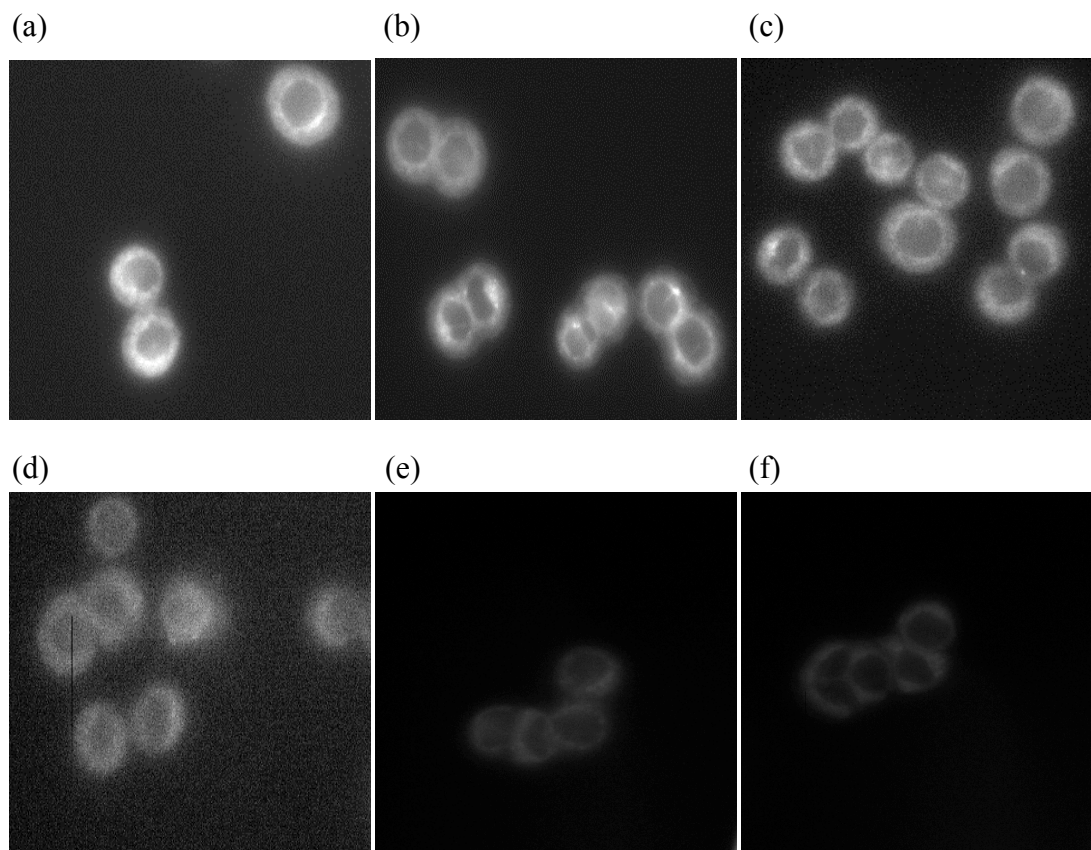

**Fig. S3** Visualisation of intracellular fluorescence of HT29 after incubation with (a) **6a**, (b) **6b**, (c) **6c**, (d) **6d**, (e) **9a** and (f) **9b** for 2 h.

In all of the following spectra, residual solvent signals are marked with asterisks

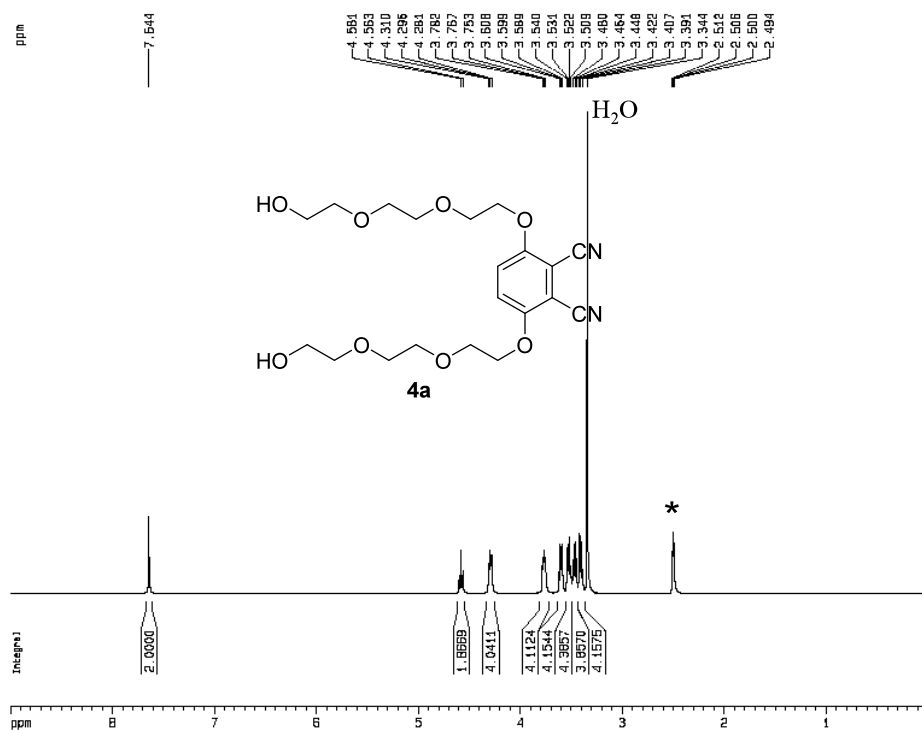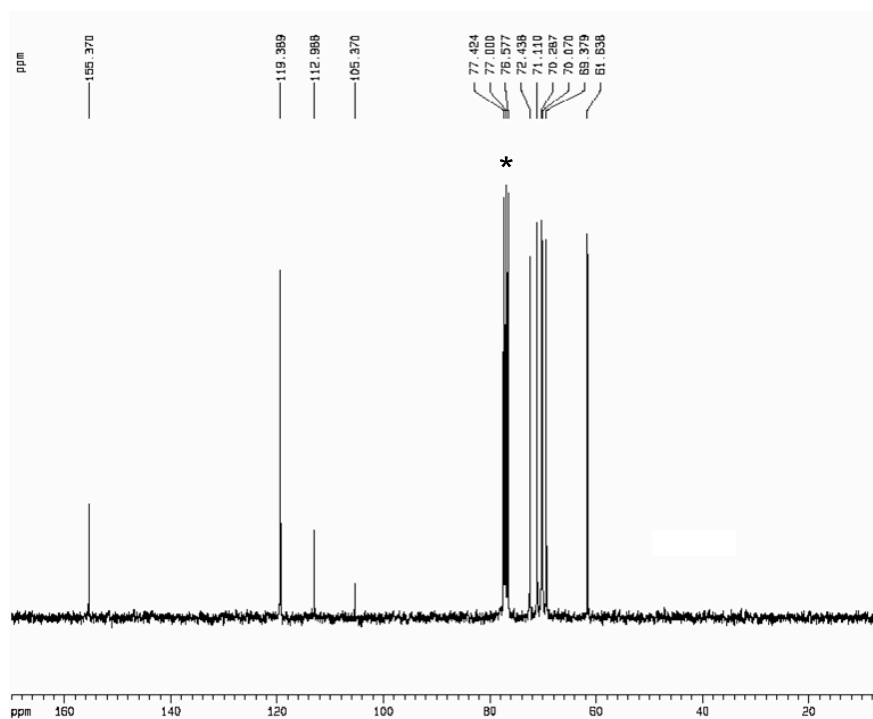

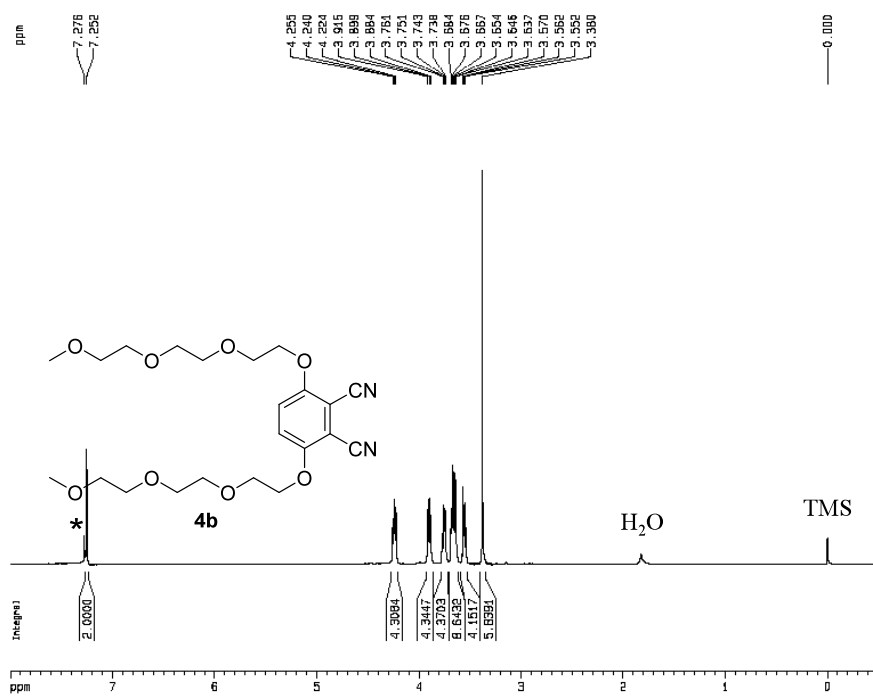

<sup>1</sup>H NMR spectrum of **4b** in CDCl<sub>3</sub>.

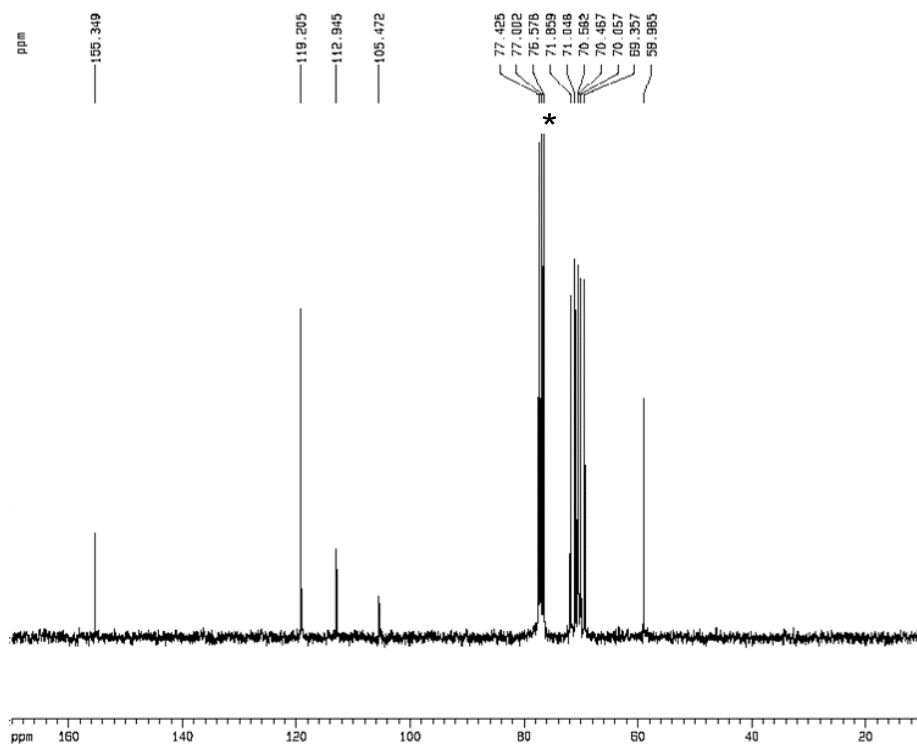

<sup>13</sup>C{<sup>1</sup>H} NMR spectrum of **4b** in CDCl<sub>3</sub>.

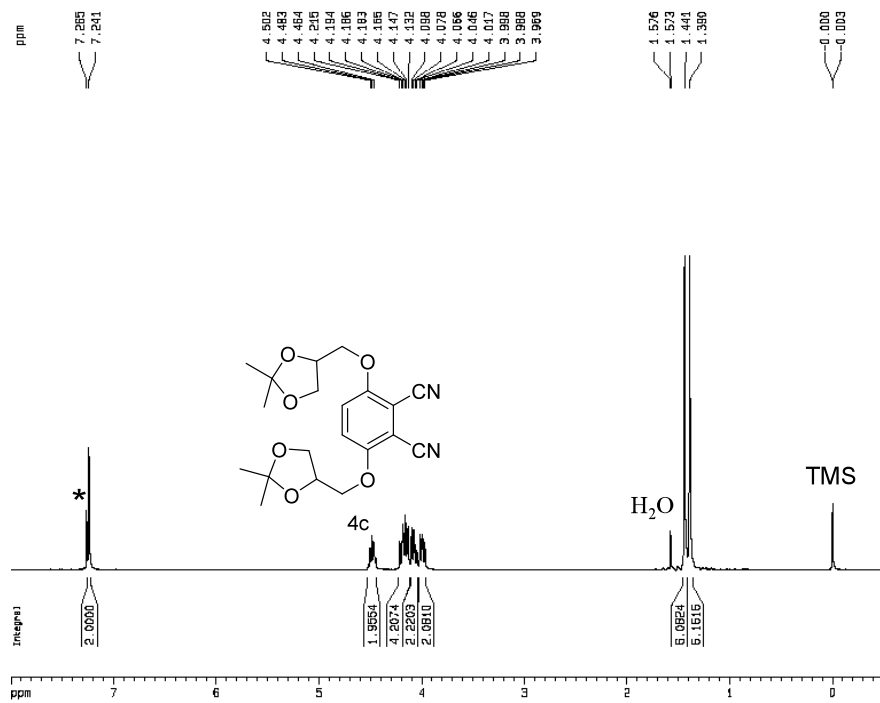

<sup>1</sup>H NMR spectrum of **4c** in CDCl<sub>3</sub>.

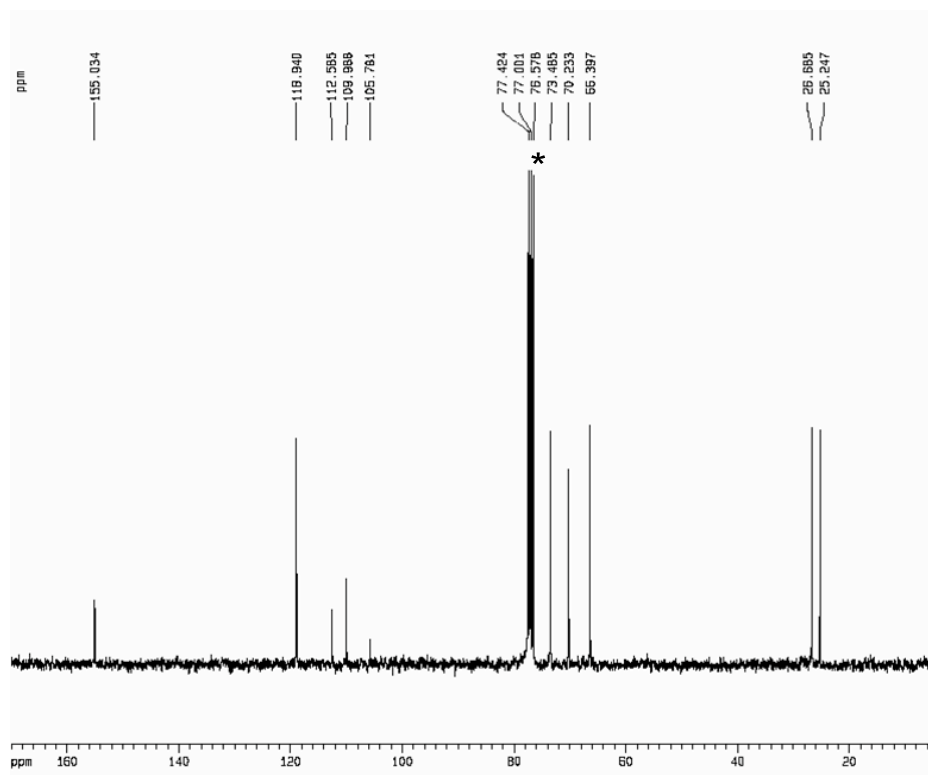

<sup>13</sup>C{<sup>1</sup>H} NMR spectrum of **4c** in CDCl<sub>3</sub>.

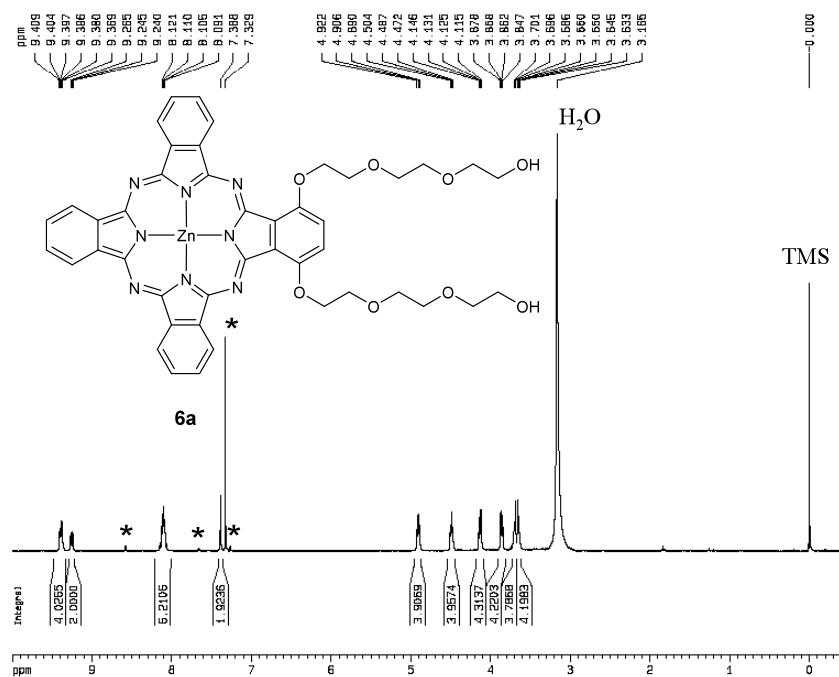

<sup>1</sup>H NMR spectrum of **6a** in CDCl<sub>3</sub> with a trace amount of pyridine-d<sub>5</sub>.

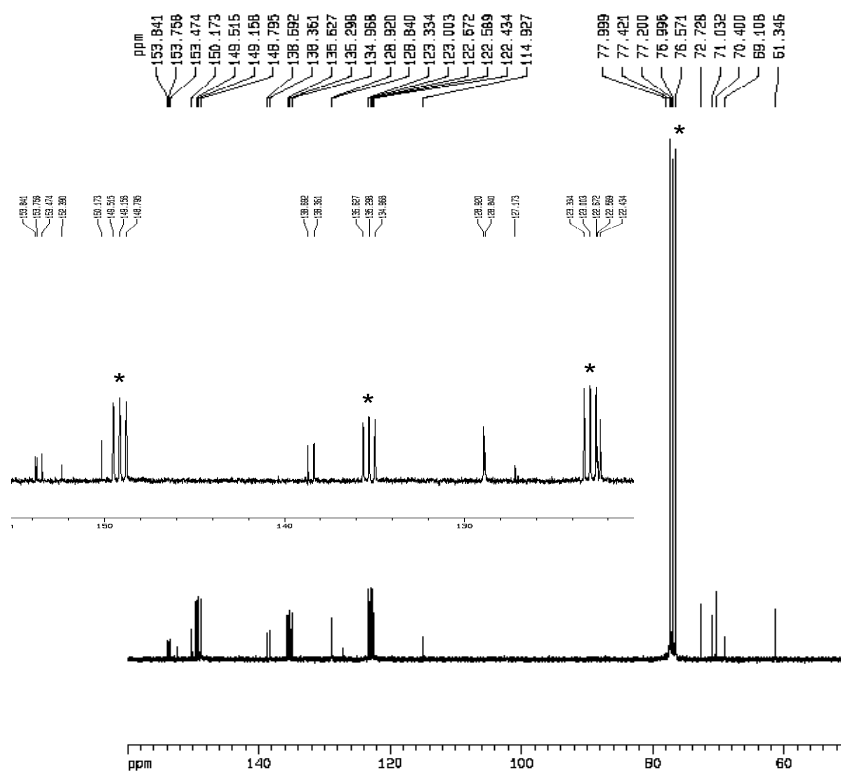

<sup>13</sup>C{<sup>1</sup>H} NMR spectrum of **6a** in CDCl<sub>3</sub> with a trace amount of pyridine-d<sub>5</sub>.



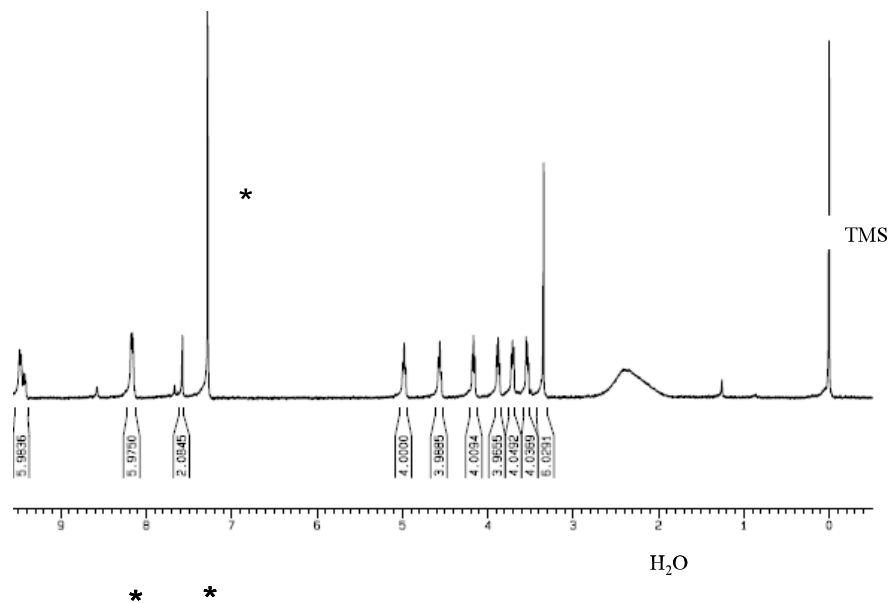

$^1\text{H}$  NMR spectrum of **6b** in  $\text{CDCl}_3$  with a trace amount of pyridine- $\text{d}_5$ .

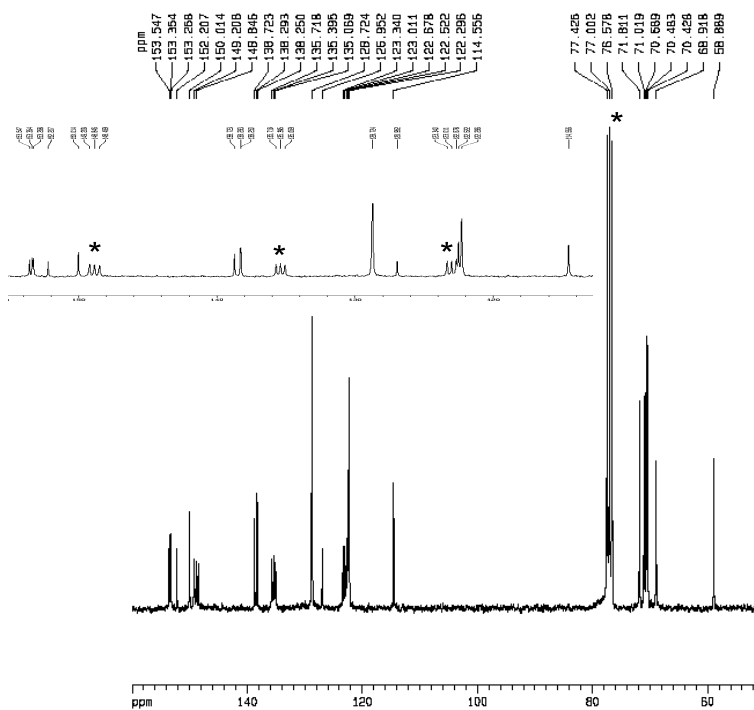

$^{13}\text{C}\{^1\text{H}\}$  NMR spectrum of **6b** in  $\text{CDCl}_3$  with a trace amount of pyridine- $\text{d}_5$ .

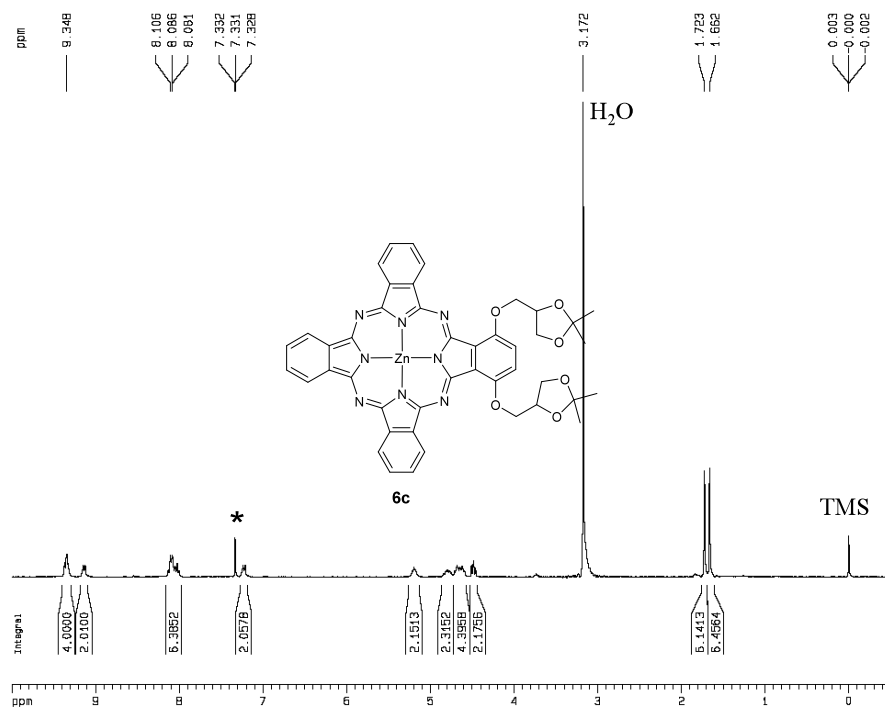

**<sup>1</sup>H NMR spectrum of 6c in CDCl<sub>3</sub> with a trace amount of pyridine-d<sub>5</sub>.**

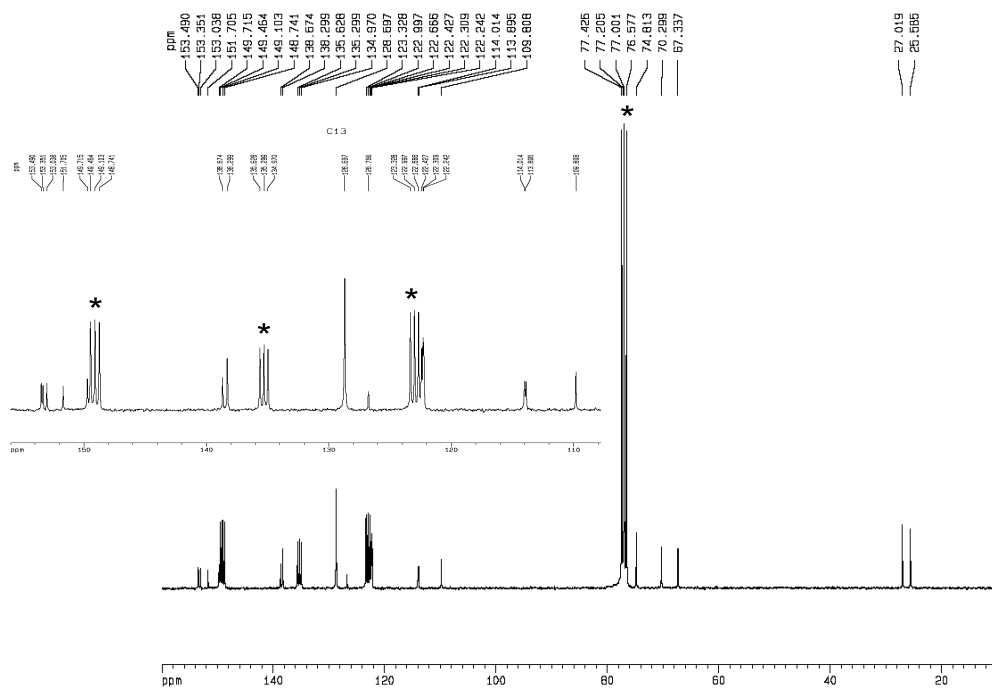

**<sup>13</sup>C{<sup>1</sup>H} NMR spectrum of 6c in CDCl<sub>3</sub> with a trace amount of pyridine-d<sub>5</sub>.**

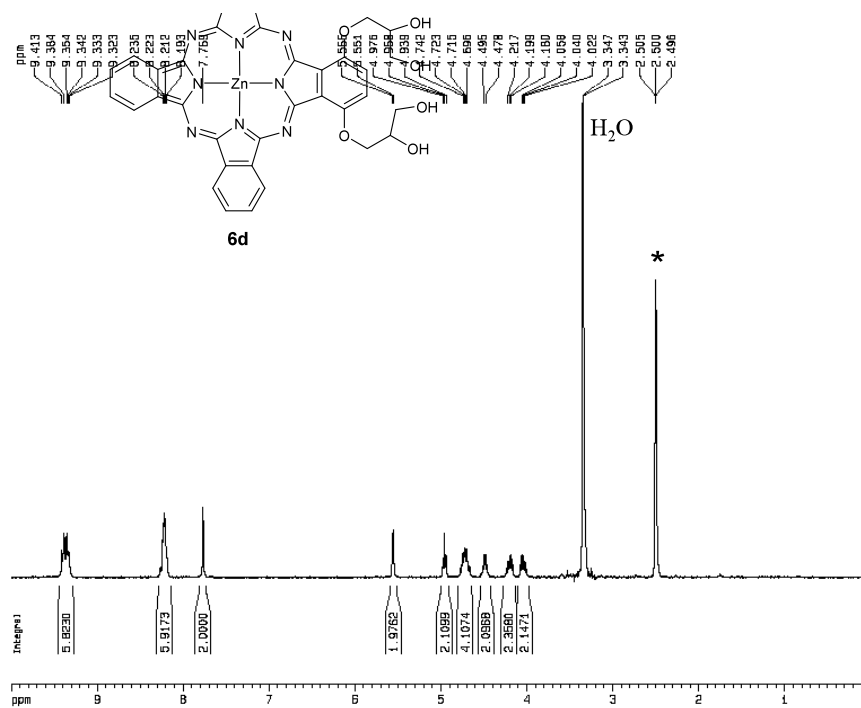

<sup>1</sup>H NMR spectrum of **6d** in DMSO-d<sub>6</sub>.

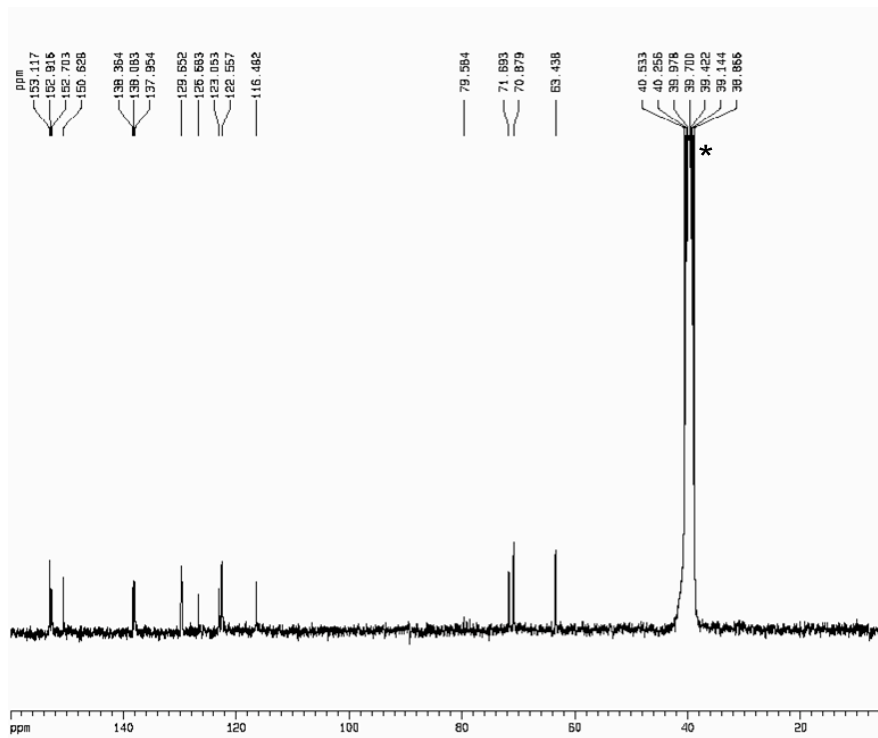

<sup>13</sup>C{<sup>1</sup>H} NMR spectrum of **6d** in DMSO-d<sub>6</sub>.

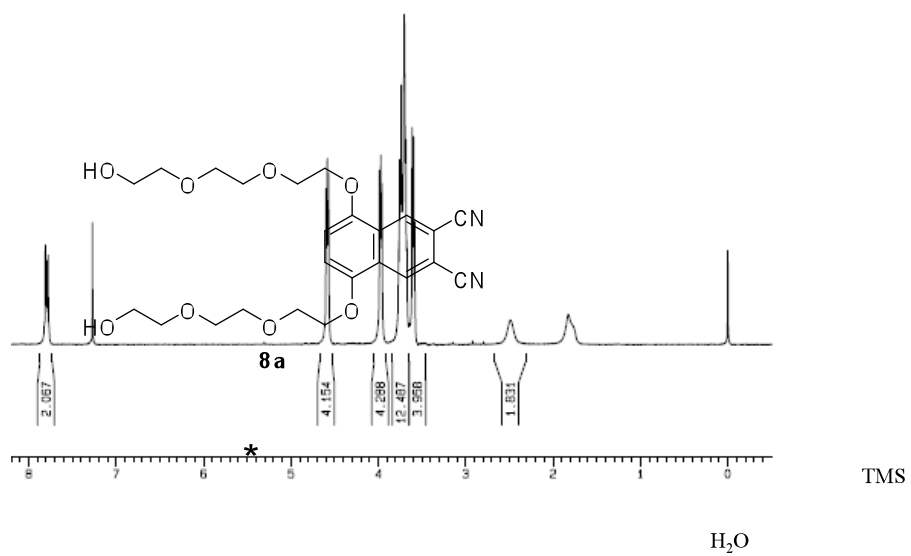

<sup>1</sup>H NMR spectrum of **8a** in CDCl<sub>3</sub>.

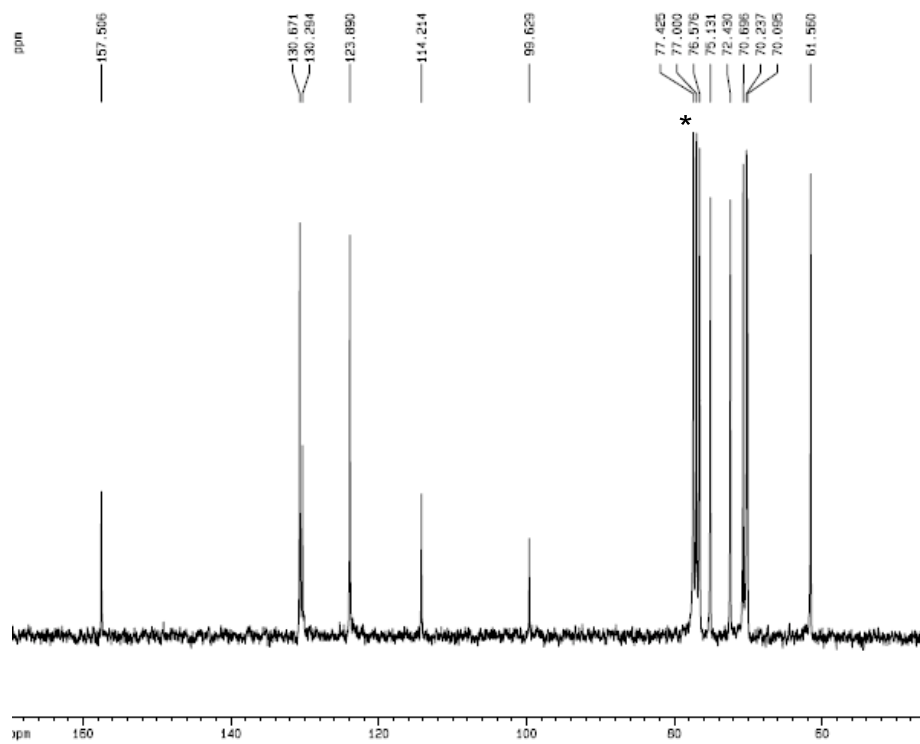

<sup>13</sup>C{<sup>1</sup>H} NMR spectrum of **8a** in CDCl<sub>3</sub>.

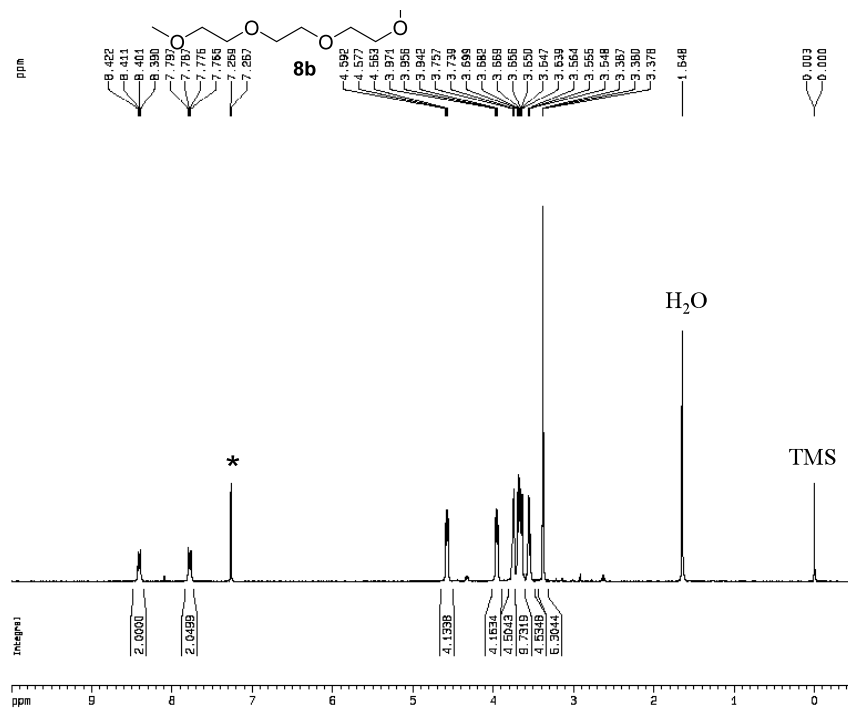

<sup>1</sup>H NMR spectrum of **8b** in CDCl<sub>3</sub>.

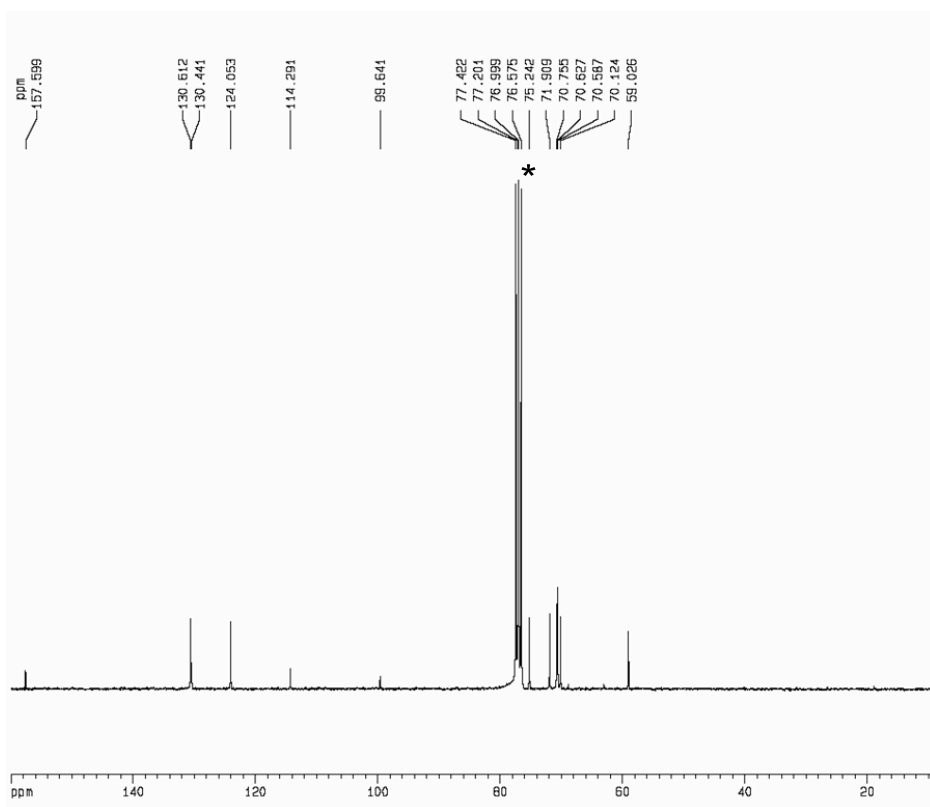

<sup>13</sup>C{<sup>1</sup>H} NMR spectrum of **8b** in CDCl<sub>3</sub>.

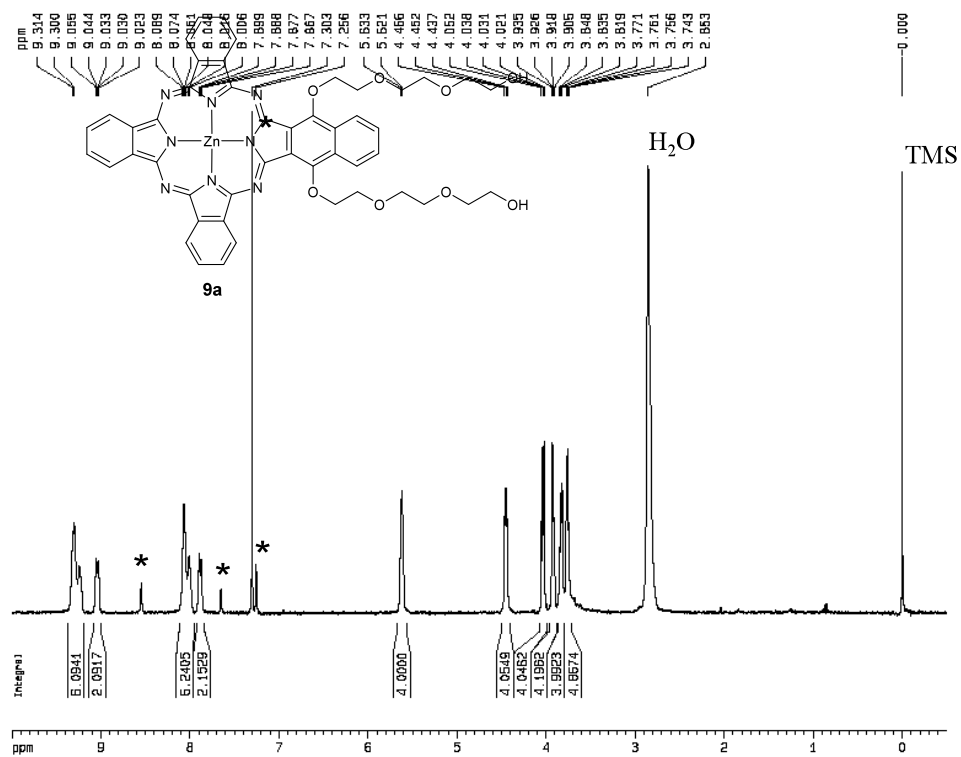

**<sup>1</sup>H NMR spectrum of 9a in CDCl<sub>3</sub> with a trace amount of pyridine-d<sub>5</sub>.**

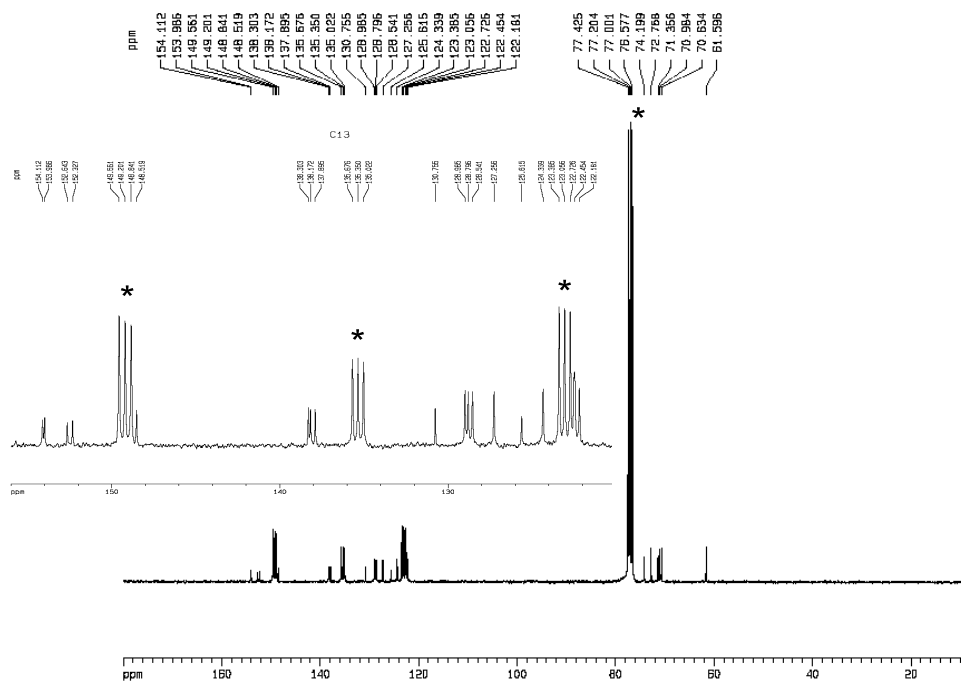

**<sup>13</sup>C{<sup>1</sup>H} NMR spectrum of 9a in CDCl<sub>3</sub> with a trace amount of pyridine-d<sub>5</sub>.**

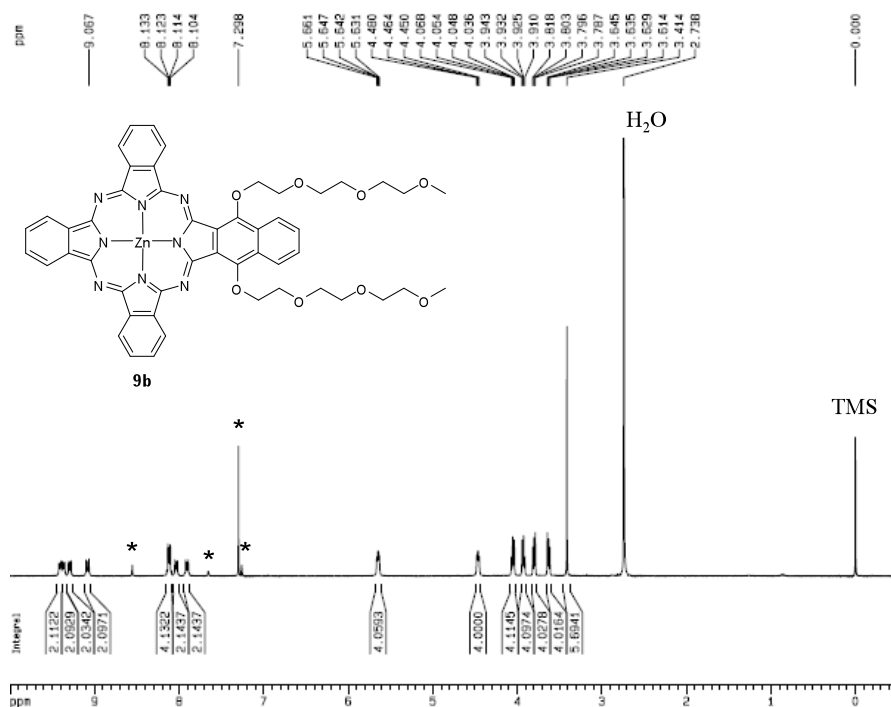

<sup>1</sup>H NMR spectrum of **9b** in CDCl<sub>3</sub> with a trace amount of pyridine-d<sub>5</sub>.

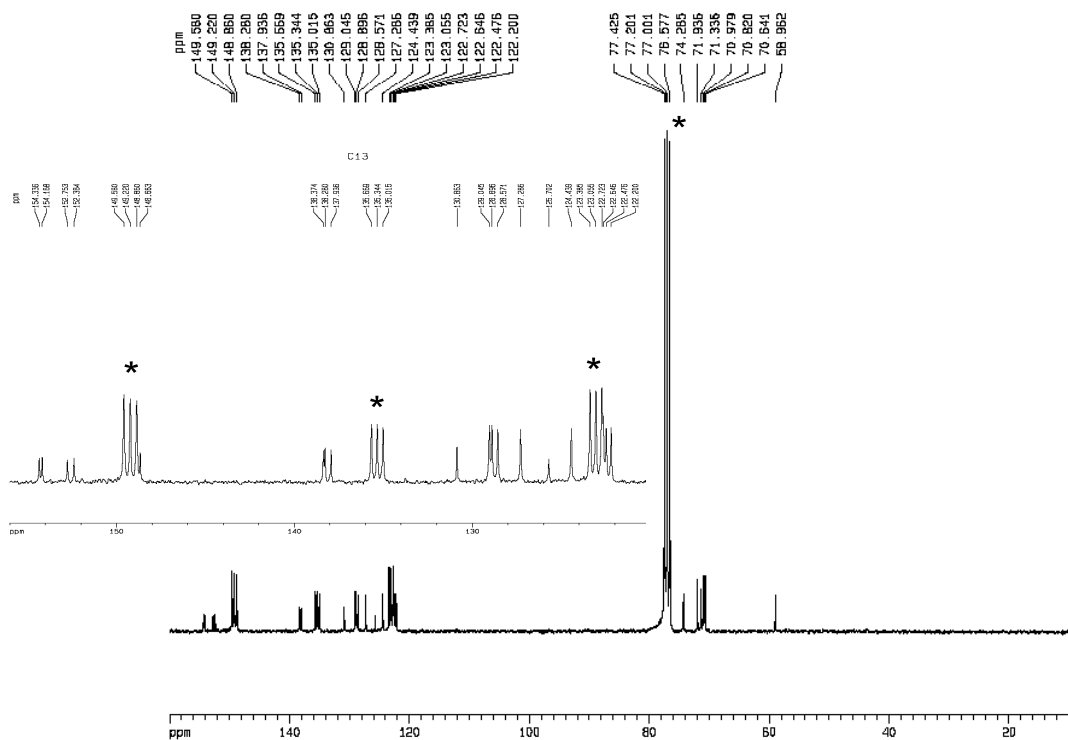

<sup>13</sup>C{<sup>1</sup>H} NMR spectrum of **9b** in CDCl<sub>3</sub> with a trace amount of pyridine-d<sub>5</sub>.
